# Supplementary material for: Quantitative Evaluation of the Crop Yield, Soil-Available Phosphorus, and Total Phosphorus Leaching Caused by Phosphorus Fertilization: A Meta-Analysis
Source: MDPI journal article supplement (doi:10.3390/agronomy13092436), 2023-09-21
Supplement: s1 [file s1]

Table S1. Publication bias test of relevant data—Egger’s test

| Data type  | fertilizer treatment | Land type         | P value |
|------------|----------------------|-------------------|---------|
| Yield      | RP                   | Vegetables fields | 0.3122  |
|            |                      | Cereal fields     | 0.5787  |
|            | NPKM                 | Vegetables fields | 0.9185  |
|            |                      | Cereal fields     | 0.0612  |
| P content  | RP                   | Vegetables fields | 0.7675  |
|            |                      | Cereal fields     | 0.6226  |
|            | NPKM                 | Vegetables fields | 0.1406  |
|            |                      | Cereal fields     | 0.3071  |
| P leaching | RP                   | Vegetables fields | 0.0632  |
|            |                      | Cereal fields     | 0.7048  |
|            | NPKM                 | Vegetables fields | 0.3593  |
|            |                      | Cereal fields     | 0.885   |

Note:  $p > 0.05$  indicates that there is no publication bias.

Table S2 Detailed information for Figure 2a and Figure 2b

|                        |                                             |                     |       | Effect<br>Size (%) | Upper<br>confidence<br>interval (%) | Lower<br>confidence<br>interval (%) | n  |
|------------------------|---------------------------------------------|---------------------|-------|--------------------|-------------------------------------|-------------------------------------|----|
| RP<br>(Figure<br>2a)   |                                             | Vegetable<br>fields | total | -0.62              | 1.09                                | -2.45                               | 46 |
|                        |                                             | Cereal<br>yields    | total | -4.57              | -2.41                               | -6.92                               | 63 |
|                        | P inputs<br>(kg/ha)                         | Vegetable<br>fields | ≤411  | -3.59              | 0.40                                | -8.19                               | 17 |
|                        |                                             |                     | > 411 | 0.92               | 2.15                                | -0.31                               | 29 |
|                        |                                             | Cereal<br>yields    | ≤125  | -5.45              | -2.65                               | -8.88                               | 39 |
|                        |                                             |                     | > 125 | -3.30              | -0.12                               | -6.52                               | 24 |
|                        | Reduction<br>proportions<br>(%)             | Vegetable<br>fields | ≤30   | -1.66              | 2.49                                | -5.91                               | 16 |
|                        |                                             |                     | 30-70 | 0.51               | -1.01                               | 2.01                                | 23 |
|                        |                                             |                     | ≥70   | -1.65              | 1.52                                | -6.81                               | 7  |
|                        |                                             | Cereal<br>yields    | ≤30   | -1.77              | 1.11                                | -4.97                               | 22 |
|                        |                                             |                     | 30-70 | -5.64              | -9.42                               | -2.12                               | 31 |
|                        |                                             |                     | ≥70   | -7.89              | -12.79                              | -3.27                               | 10 |
| NPKM<br>(Figure<br>2b) |                                             | Vegetable<br>fields | total | 3.96               | 8.73                                | -0.45                               | 16 |
|                        |                                             | Cereal<br>yields    | total | 12.73              | 16.59                               | 8.93                                | 31 |
|                        | P inputs<br>(kg/ha)                         | Vegetable<br>fields | ≤161  | 1.06               | 6.00                                | -6.10                               | 4  |
|                        |                                             |                     | > 161 | 5.82               | 11.88                               | -0.53                               | 12 |
|                        |                                             | Cereal<br>yields    | ≤67   | 13.53              | 20.42                               | 7.67                                | 13 |
|                        |                                             |                     | > 67  | 12.12              | 16.88                               | 6.74                                | 18 |
|                        | Organic<br>fertilizer<br>proportions<br>(%) | Vegetable<br>fields | ≤30   | ——                 | ——                                  | ——                                  | —— |
|                        |                                             |                     | 30-70 | 4.44               | 10.32                               | -1.65                               | 14 |
|                        |                                             |                     | ≥70   | 2.61               | 5.50                                | -0.16                               | 2  |
|                        |                                             | Cereal<br>yields    | ≤30   | 2.32               | -3.19                               | 8.53                                | 3  |
|                        |                                             |                     | 30-70 | 14.94              | 18.14                               | 11.22                               | 20 |
|                        |                                             |                     | ≥70   | 9.48               | 20.54                               | -3.83                               | 5  |

Table S3. Detailed information for Figure 3a and Figure 3b

|                     |                                    |                  |       | Effect Size (%) | Upper confidence interval (%) | Lower confidence interval (%) | n  |
|---------------------|------------------------------------|------------------|-------|-----------------|-------------------------------|-------------------------------|----|
| RP<br>(Figure 3a)   | Soil depth (cm)                    | Vegetable fields | 0-20  | -29.75          | -35.85                        | -23.62                        | 44 |
|                     |                                    |                  | 20-40 | -40.29          | -49.19                        | -30.32                        | 11 |
|                     |                                    |                  | 40-60 | -22.93          | -37.92                        | -3.41                         | 11 |
|                     |                                    | Cereal yields    | 0-20  | -34.45          | -40.68                        | -27.97                        | 70 |
|                     |                                    |                  | 20-40 | -19.97          | -27.14                        | -12.32                        | 41 |
|                     |                                    |                  | 40-60 | -18.94          | -27.34                        | -9.81                         | 22 |
|                     | P inputs (kg/ha)                   | Vegetable fields | ≤411  | -31.87          | -42.75                        | -20.28                        | 20 |
|                     |                                    |                  | > 411 | -27.84          | -33.04                        | -22.51                        | 21 |
|                     |                                    | Cereal yields    | ≤125  | -34.37          | -41.87                        | -26.69                        | 44 |
|                     |                                    |                  | > 125 | -34.51          | -44.84                        | -23.56                        | 26 |
|                     | Reduction proportions (%)          | Vegetable fields | ≤30   | -14.02          | -21.00                        | -6.64                         | 11 |
|                     |                                    |                  | 30-70 | -28.48          | -35.27                        | -21.79                        | 24 |
|                     |                                    |                  | ≥60   | -56.59          | -64.70                        | -47.99                        | 6  |
|                     |                                    | Cereal yields    | ≤30   | -20.63          | -27.31                        | -13.89                        | 14 |
|                     |                                    |                  | 30-70 | -29.06          | -36.40                        | -21.58                        | 37 |
|                     |                                    |                  | ≥70   | -51.40          | -62.19                        | -38.90                        | 19 |
| NPKM<br>(Figure 3b) | Soil depth (cm)                    | Vegetable fields | 0-20  | 23.87           | 41.52                         | 10.62                         | 51 |
|                     |                                    |                  | 20-40 | 52.44           | 77.34                         | 32.05                         | 30 |
|                     |                                    |                  | 40-60 | 23.43           | 51.45                         | 1.92                          | 34 |
|                     |                                    | Cereal yields    | 0-20  | 76.72           | 84.82                         | 70.13                         | 52 |
|                     |                                    |                  | 20-40 | 29.10           | 60.11                         | 3.73                          | 8  |
|                     |                                    |                  | 40-60 | 22.30           | 57.63                         | -3.28                         | 5  |
|                     | P inputs (kg/ha)                   | Vegetable fields | ≤161  | 7.78            | 35.99                         | -15.24                        | 14 |
|                     |                                    |                  | > 161 | 29.76           | 45.03                         | 17.33                         | 36 |
|                     |                                    | Cereal yields    | ≤67   | 52.01           | 69.28                         | 35.64                         | 19 |
|                     |                                    |                  | > 67  | 39.36           | 52.96                         | 28.08                         | 7  |
|                     | Organic fertilizer proportions (%) | Vegetable fields | ≤30   | 10.26           | 45.44                         | -11.86                        | 13 |
|                     |                                    |                  | 30-70 | 22.79           | 35.95                         | 11.74                         | 25 |
|                     |                                    |                  | ≥70   | 40.76           | 73.05                         | 16.59                         | 13 |
|                     |                                    | Cereal yields    | ≤30   | 53.34           | 85.84                         | 26.81                         | 6  |
|                     |                                    |                  | 30-70 | 60.42           | 68.57                         | 53.08                         | 33 |
|                     |                                    |                  | ≥70   | 49.59           | 60.19                         | 39.40                         | 13 |

Table S4. Detailed information for Figure 4a and Figure 4b

|                        |                                          |                     |       | Effect<br>Size<br>(%) | Upper<br>confidence<br>interval (%) | Lower<br>confidence<br>interval (%) | n   |
|------------------------|------------------------------------------|---------------------|-------|-----------------------|-------------------------------------|-------------------------------------|-----|
| RP<br>(Figure<br>4a)   |                                          | Vegetable<br>fields | total | -16.02                | -8.94                               | -22.53                              | 141 |
|                        |                                          | Cereal<br>yields    | total | -31.50                | -22.83                              | -39.04                              | 60  |
|                        | P inputs (kg/ha)                         | Vegetable<br>fields | ≤269  | -19.14                | -10.01                              | -27.54                              | 87  |
|                        |                                          |                     | > 269 | -18.67                | -5.17                               | -30.72                              | 40  |
|                        |                                          | Cereal<br>yields    | ≤219  | -32.70                | -19.38                              | -44.26                              | 28  |
|                        |                                          |                     | > 219 | -30.66                | -11.24                              | -44.53                              | 23  |
|                        | Reduction<br>proportions (%)             | Vegetable<br>fields | ≤30   | -11.28                | -4.59                               | -17.54                              | 55  |
|                        |                                          |                     | 30-70 | -21.23                | -5.20                               | -34.81                              | 49  |
|                        |                                          |                     | ≥70   | -36.49                | -8.58                               | -58.67                              | 9   |
|                        |                                          | Cereal<br>yields    | ≤30   | -23.05                | -12.78                              | -31.27                              | 6   |
|                        |                                          |                     | 30-70 | -22.91                | -7.61                               | -35.07                              | 31  |
|                        |                                          |                     | ≥70   | -48.11                | -32.46                              | -58.99                              | 16  |
| NPKM<br>(Figure<br>4b) |                                          | Vegetable<br>fields | total | 30.43                 | 44.25                               | 18.86                               | 37  |
|                        |                                          | Cereal<br>yields    | total | 30.08                 | 57.54                               | -1.94                               | 16  |
|                        | P inputs (kg/ha)                         | Vegetable<br>fields | ≤187  | 37.22                 | 44.95                               | 28.71                               | 19  |
|                        |                                          |                     | > 187 | 15.47                 | 9.35                                | 21.96                               | 14  |
|                        |                                          | Cereal<br>yields    | ≤116  | 28.67                 | 62.48                               | -7.04                               | 5   |
|                        |                                          |                     | > 116 | -3.45                 | 14.83                               | -22.38                              | 5   |
|                        | Organic<br>fertilizer<br>proportions (%) | Vegetable<br>fields | ≤30   | 19.14                 | 31.21                               | 9.40                                | 8   |
|                        |                                          |                     | 30-70 | 35.70                 | 49.51                               | 21.75                               | 18  |
|                        |                                          |                     | ≥70   | -1.03                 | 4.60                                | -6.44                               | 9   |
|                        |                                          | Cereal<br>yields    | ≤30   | -2.99                 | 19.51                               | -25.05                              | 3   |
|                        |                                          |                     | 30-70 | 32.29                 | 56.89                               | 16.38                               | 5   |
|                        |                                          |                     | ≥70   | 26.81                 | 52.81                               | -4.56                               | 4   |

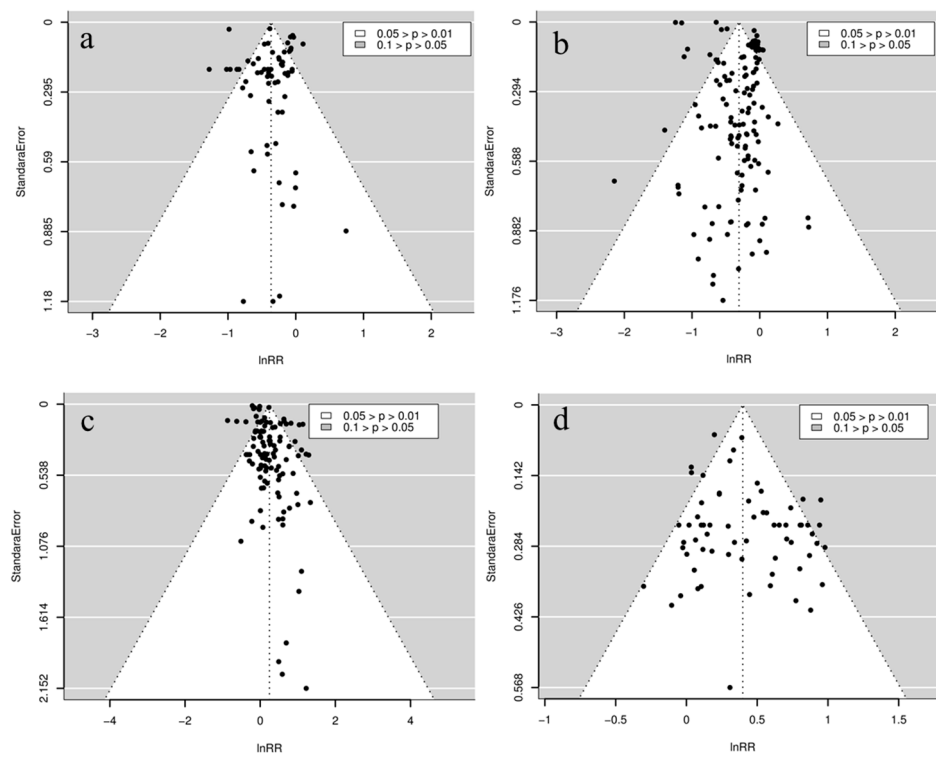

Figure S1. Publication bias test of crop yield data—Funnel plot

RP in vegetables fields (a) and cereal fields (b), NPKM in vegetables fields (c) and cereal fields (d)

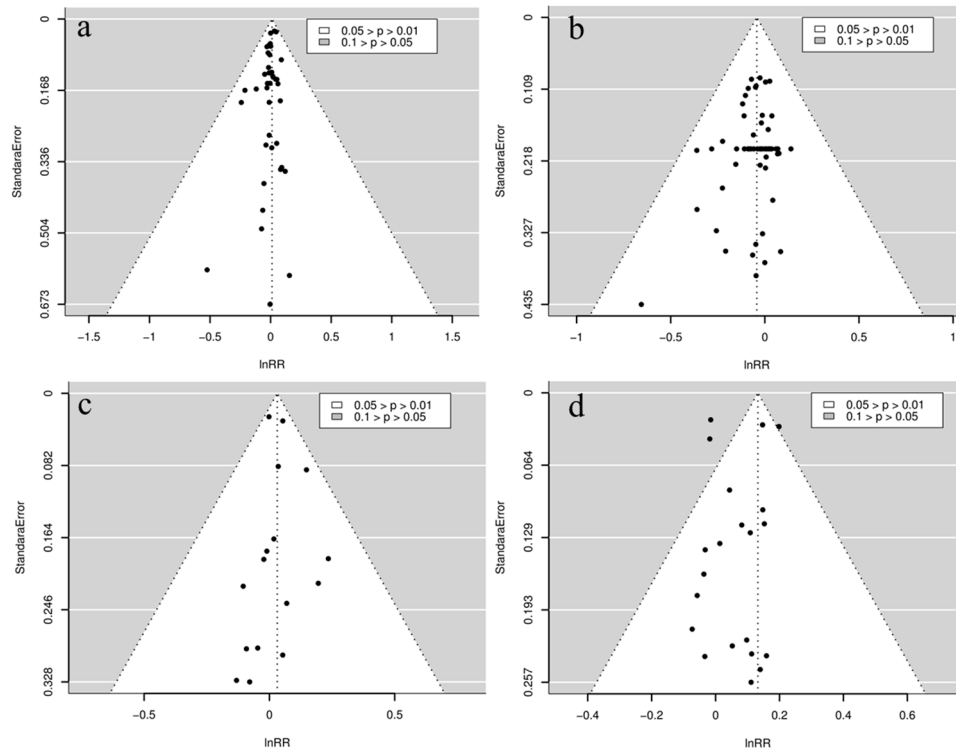

Figure S2. Publication bias test of soil available P data—Funnel plot

RP in vegetables fields (a) and cereal fields (b), NPKM in vegetables fields (c) and cereal fields (d)

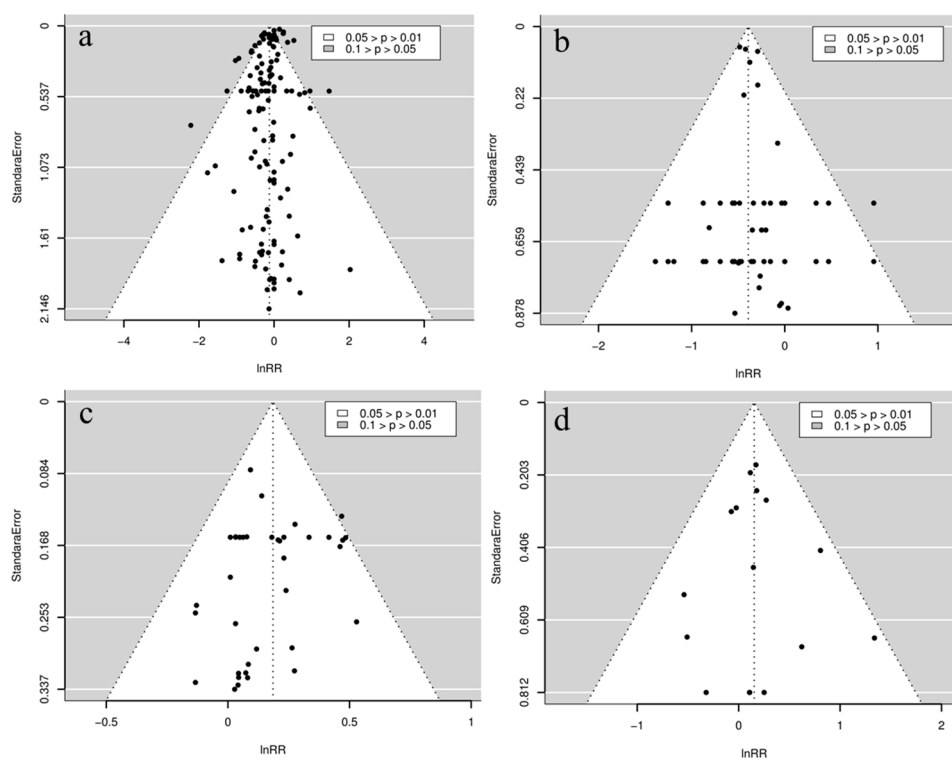

Figure S3. Publication bias test of total P leaching data—Funnel plot

RP in vegetables fields (a) and cereal fields (b), NPKM in vegetables fields (c) and cereal fields (d)
